# Supplementary material
Source: ML conference proceedings conference paper supplement (https://openaccess.thecvf.com/content/cvpr_2015/html/Ma_Small_Instance_Detection_2015_CVPR_paper.html)
Supplement: Supplementary file 1 [file Ma_Small_Instance_Detection_2015_CVPR_supplemental.zip]

Archive with 2 entries (2 files):
- video_ucsd_split-max.mov
- cvpr2015-supplemental_material.pdf
